# Supplementary material
Source: publisher figshare collection journal article supplement (https://tandf.figshare.com/ndownloader/files/36573943)
Supplement: Supplementary file 1 [file 36573943]

**Supplementary Information (SI):**

Numerical investigations on the difference between aiding and opposing flows in the developing regime of laminar mixed convection in vertical tubes

Somenath Goraia,b, Sarit K. Dasc* and Devranjan Samantaa*

aDepartment of Mechanical Engineering, Indian Institute of Technology Ropar, Rupnagar, India;
bDepartment of Mechanical Engineering, Manipal University Jaipur, Jaipur, India;

cDepartment of Mechanical Engineering, Indian Institute of Technology Madras, Chennai, India

*Corresponding author: [devranjan.samanta@iitrpr.ac.in](mailto:devranjan.samanta@iitrpr.ac.in)


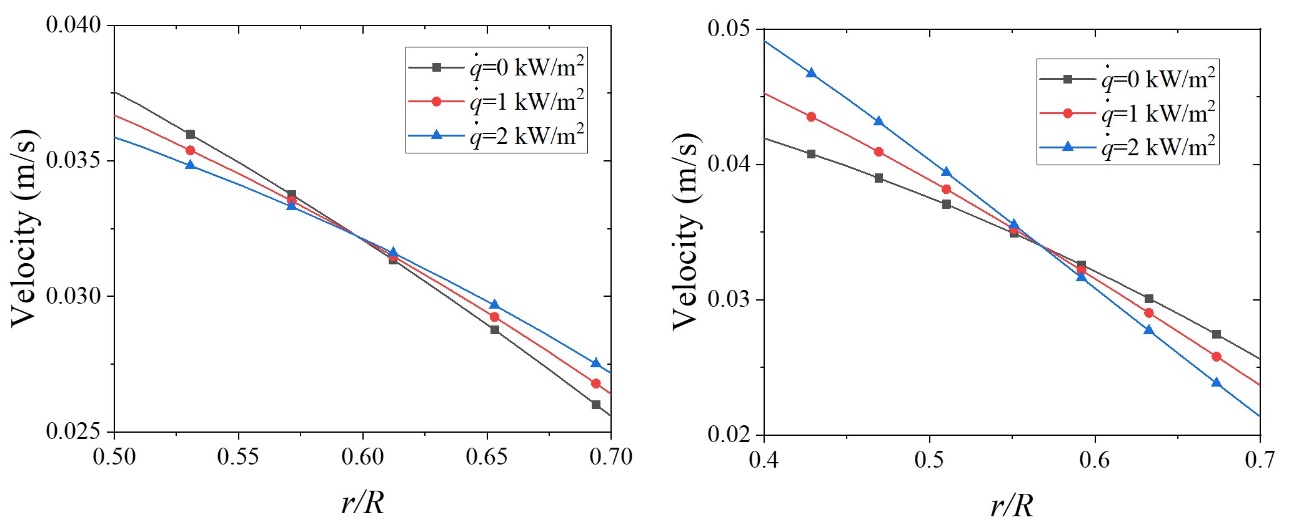


(a) (b)

Fig. SI-1: Magnified view of (a) Fig. 5b and (b) Fig. 16b within region


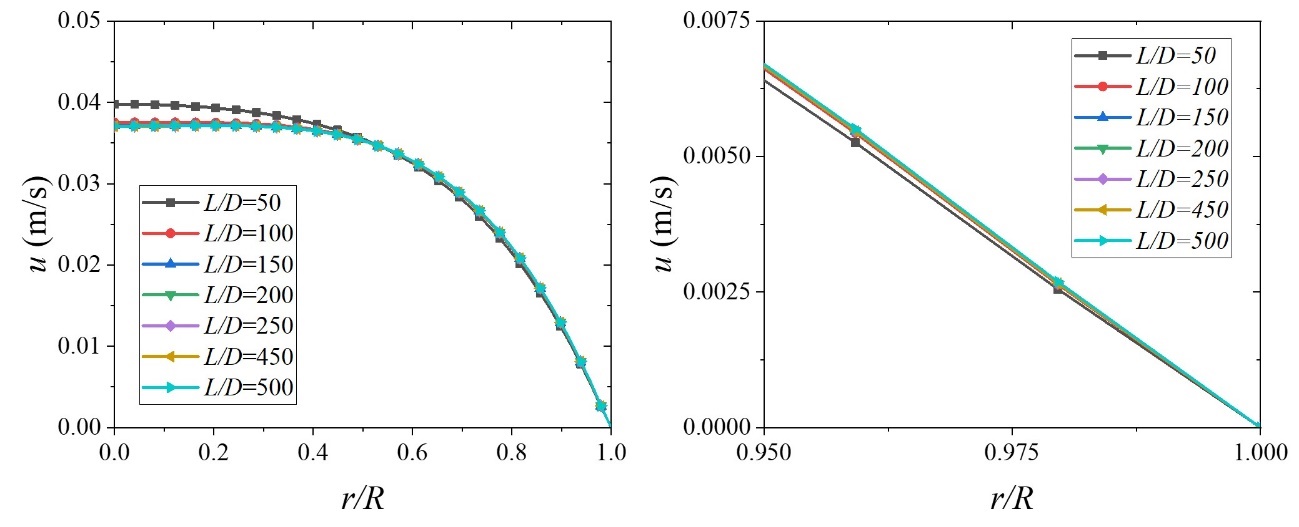


(a) (b)

Fig. SI-2: (a) Velocity profile and (b) magnified velocity near the walls () at different axial length (for Fig. 5b at )


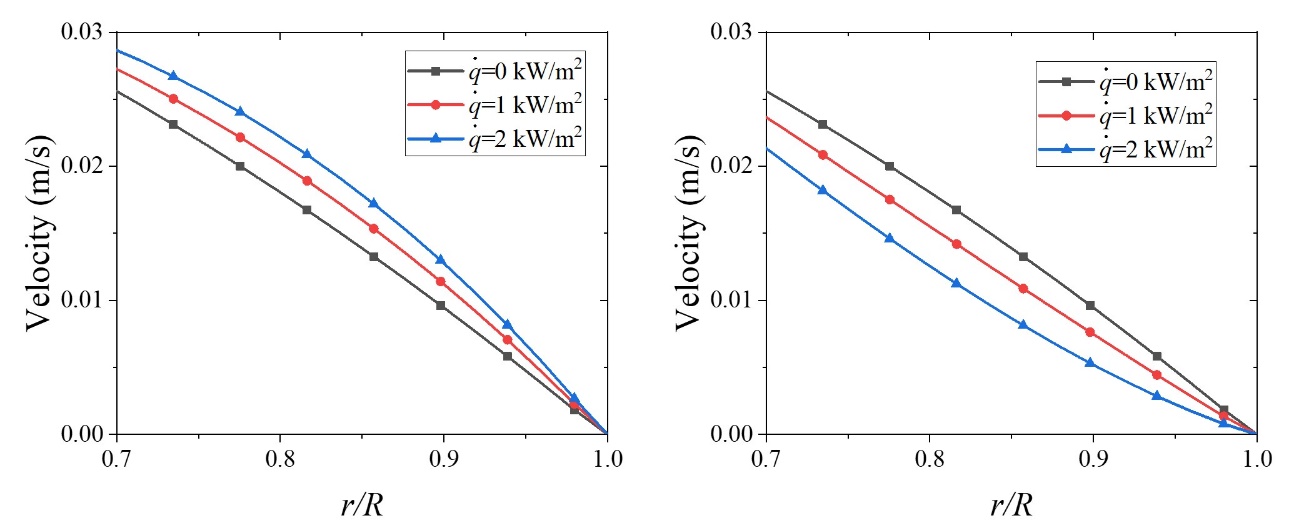


(a) (b)

Fig. SI-3: Magnified view of (a) Fig. 5b and (b) Fig. 16b adjacent to the wall i.e., , based upon which the friction factor is defined


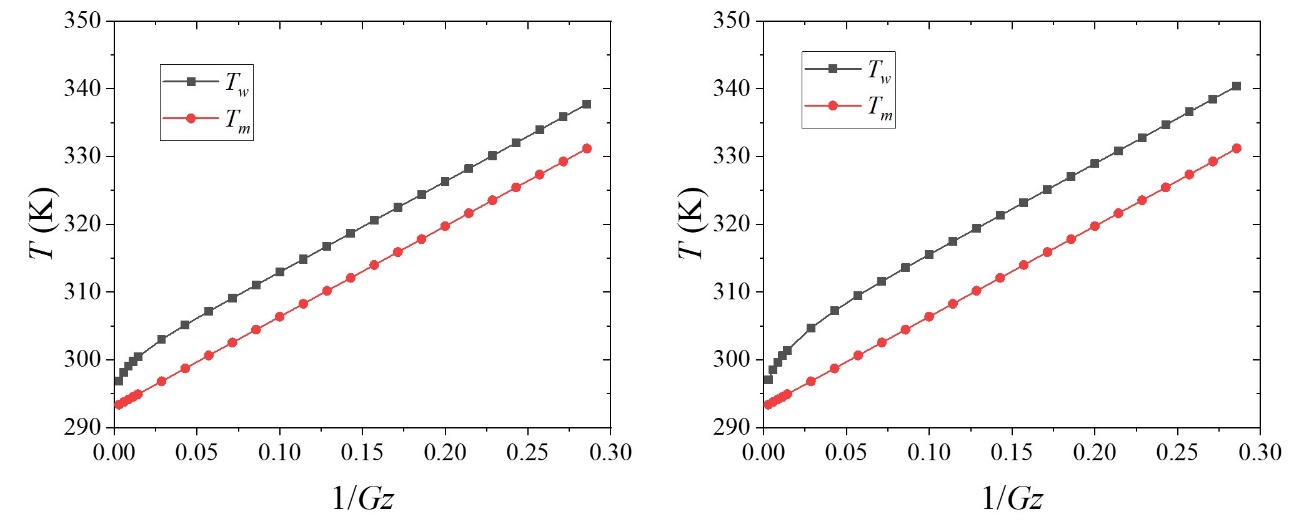


(a) (b)

Fig. SI-4: Wall temperature () and mean temperature () variation at different axial length (for Fig. 7b and 18b at ) for (a) assisting and (b) opposing flow


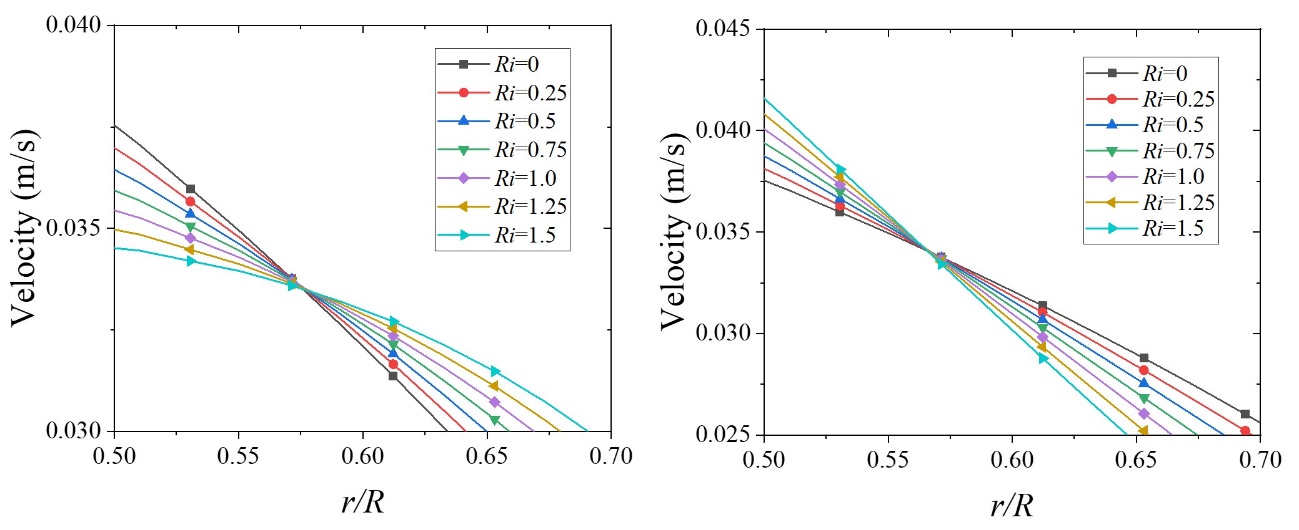


(a) (b)

Fig. SI-5: Magnified view of (a) Fig. 8b and (b) Fig. 19b


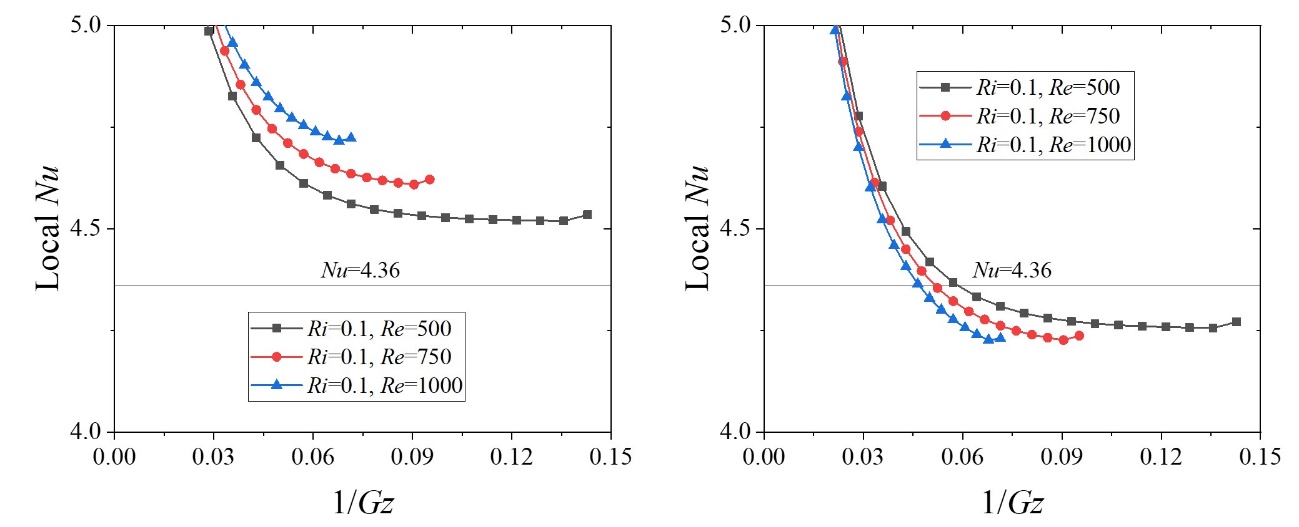


(a) (b)

Fig. SI-6: Magnified view of (a) Fig. 12b and (b) Fig. 23b


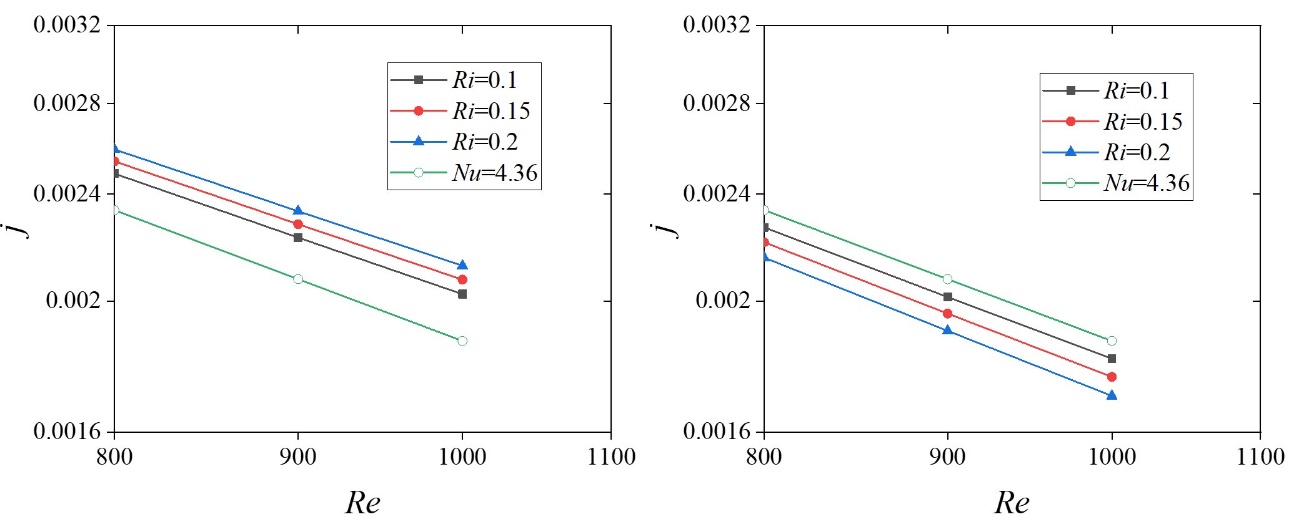


(a) (b)

Fig. SI-7: Magnified view of (a) Fig. 14 and (b) Fig. 25


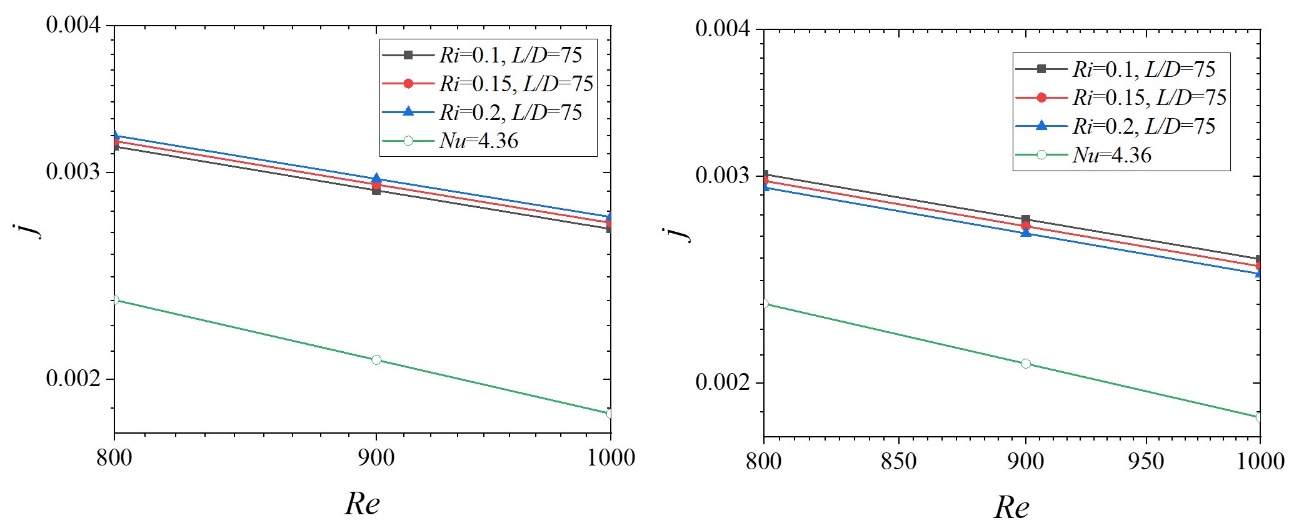


(a) (b)

Fig. SI-8: Enlarged view of (a) Fig. 15b and (b) Fig. 26b


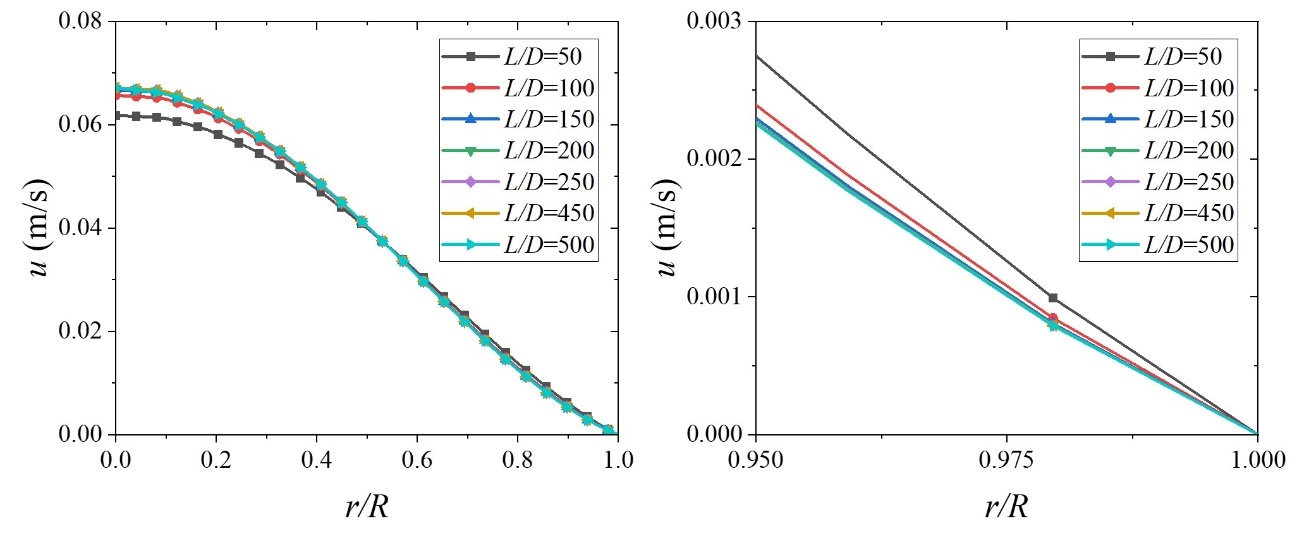


(a) (b)

Fig. SI-9: (a) Velocity profile and (b) magnified velocity near the walls () at different axial length (for Fig. 16b at )


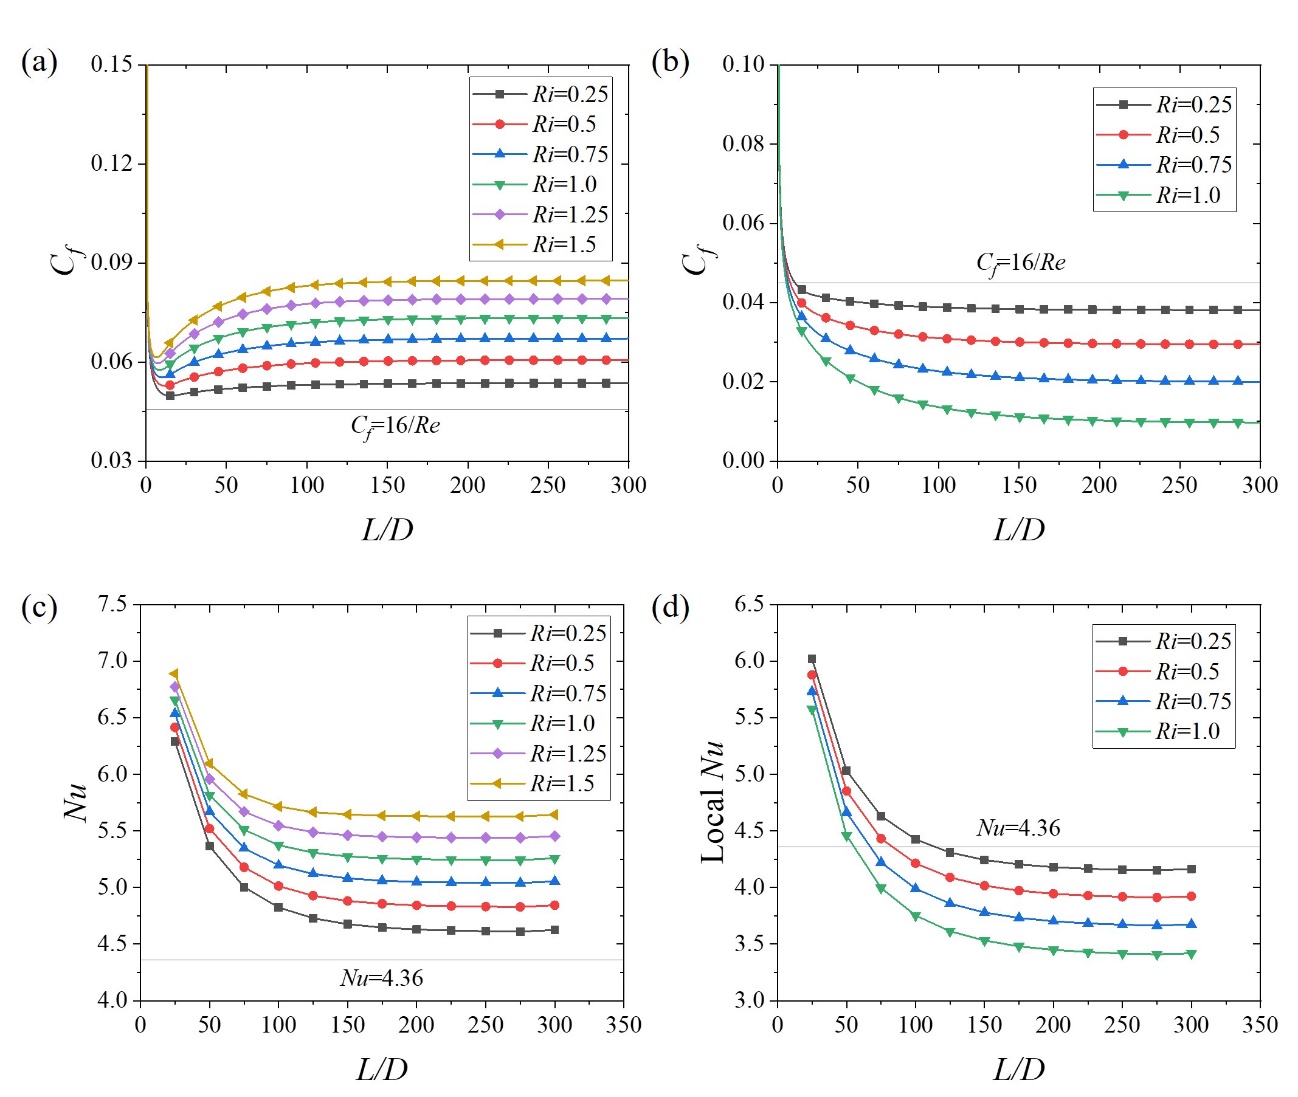


Fig. SI-10: Local and plot corresponding to different at for (a, c) assisting and (b, d) opposing flow (numerical instability observed after )


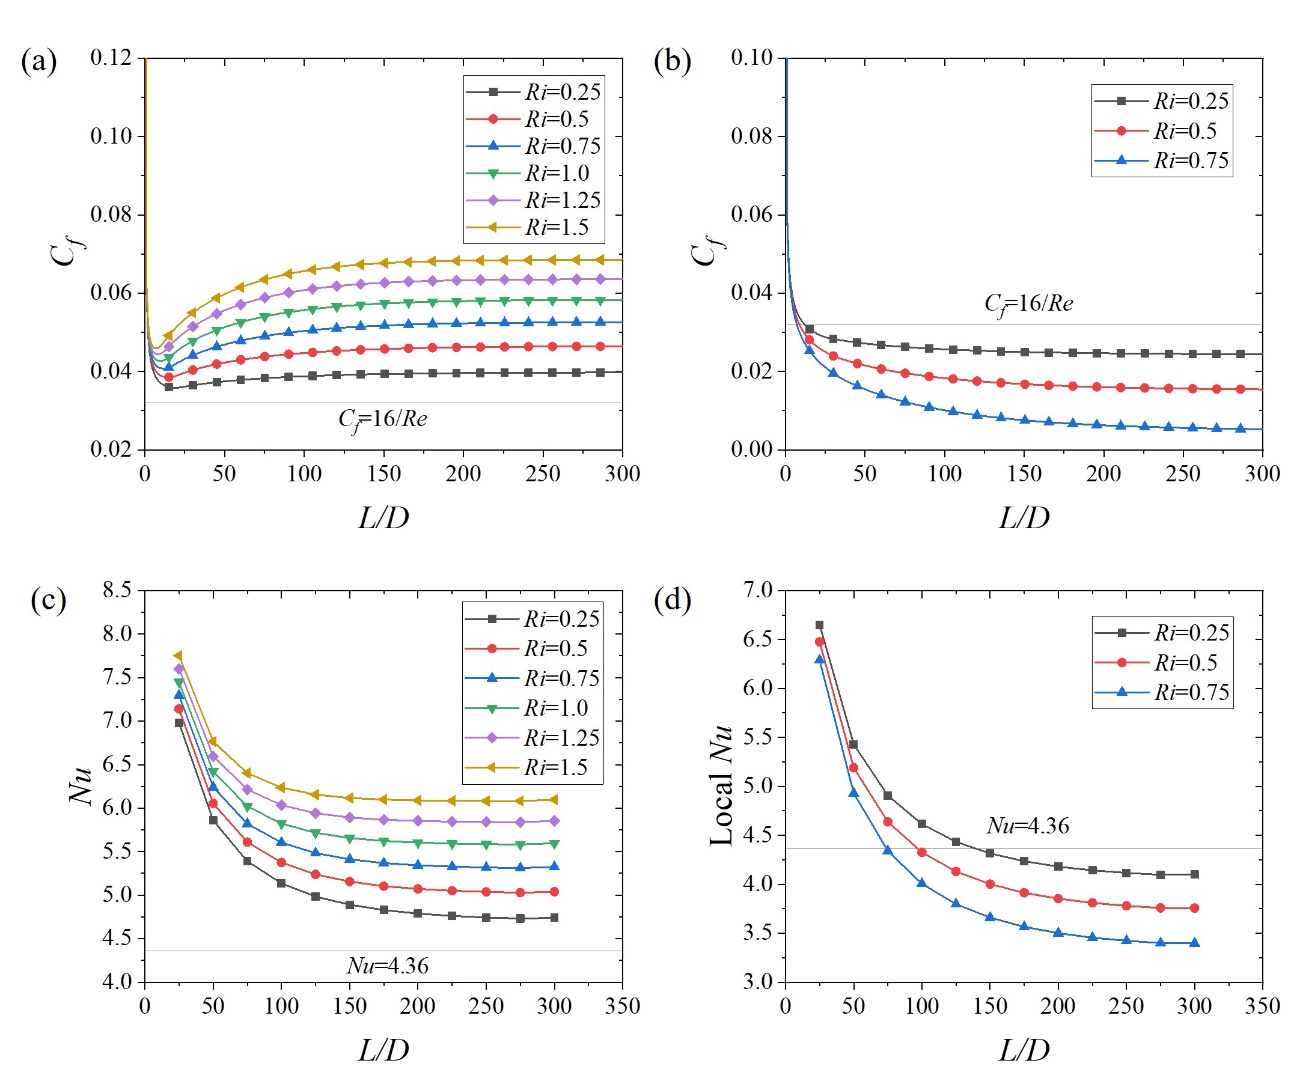


Fig. SI-11: Local and plot corresponding to different at for (a, c) assisting and (b, d) opposing flow (numerical instability observed after )


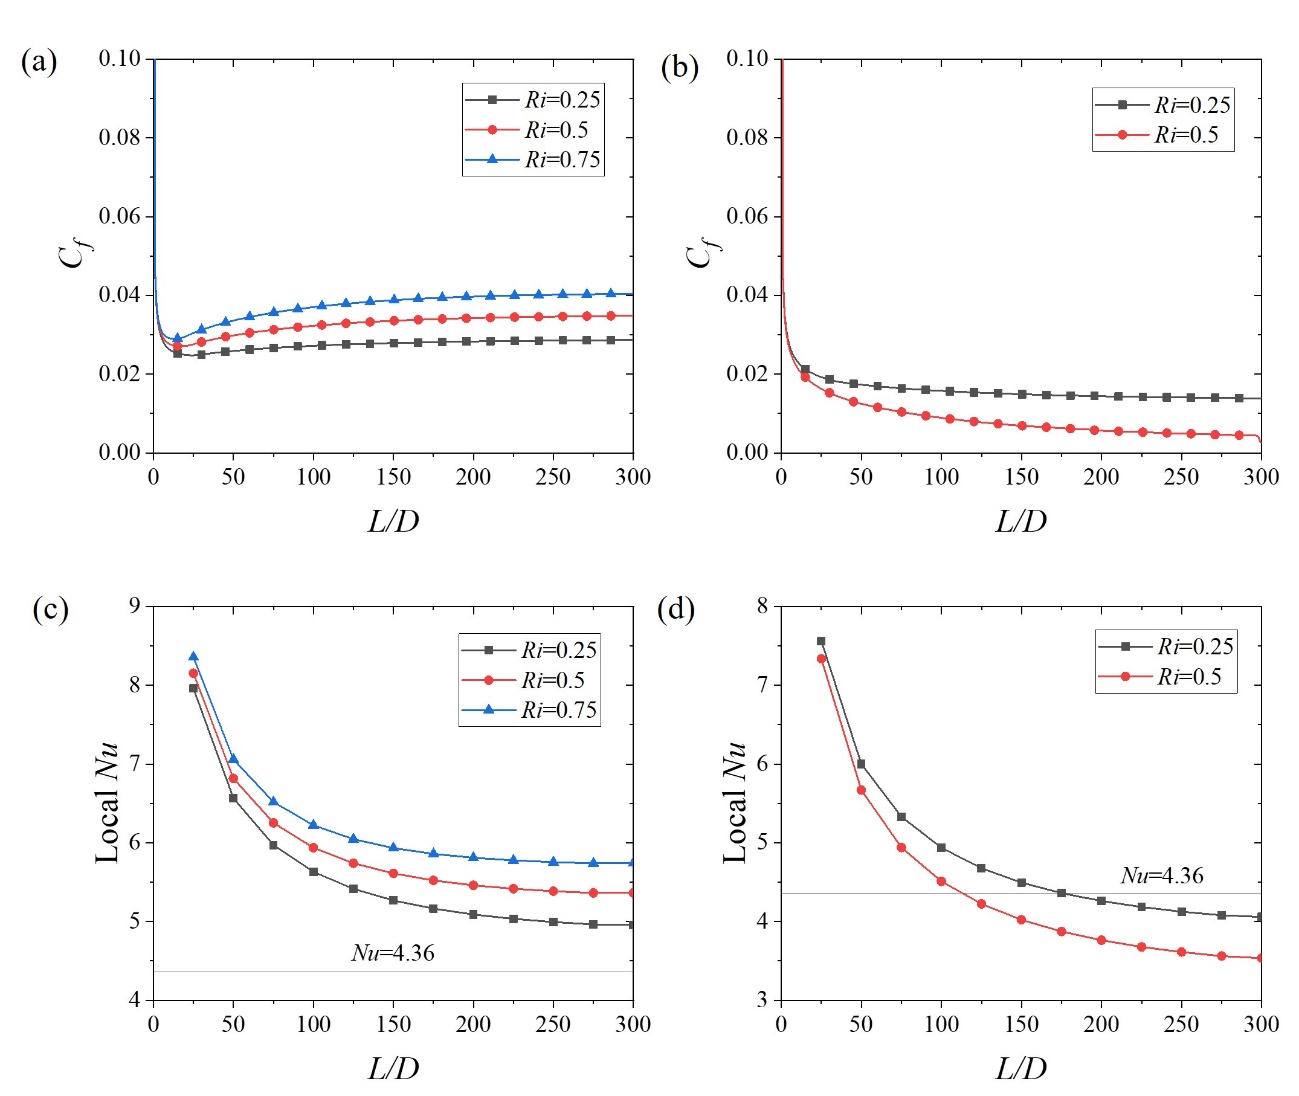


Fig. SI-12: Local and plot corresponding to different at for (a, c) assisting and (b, d) opposing flow (numerical instability observed after )


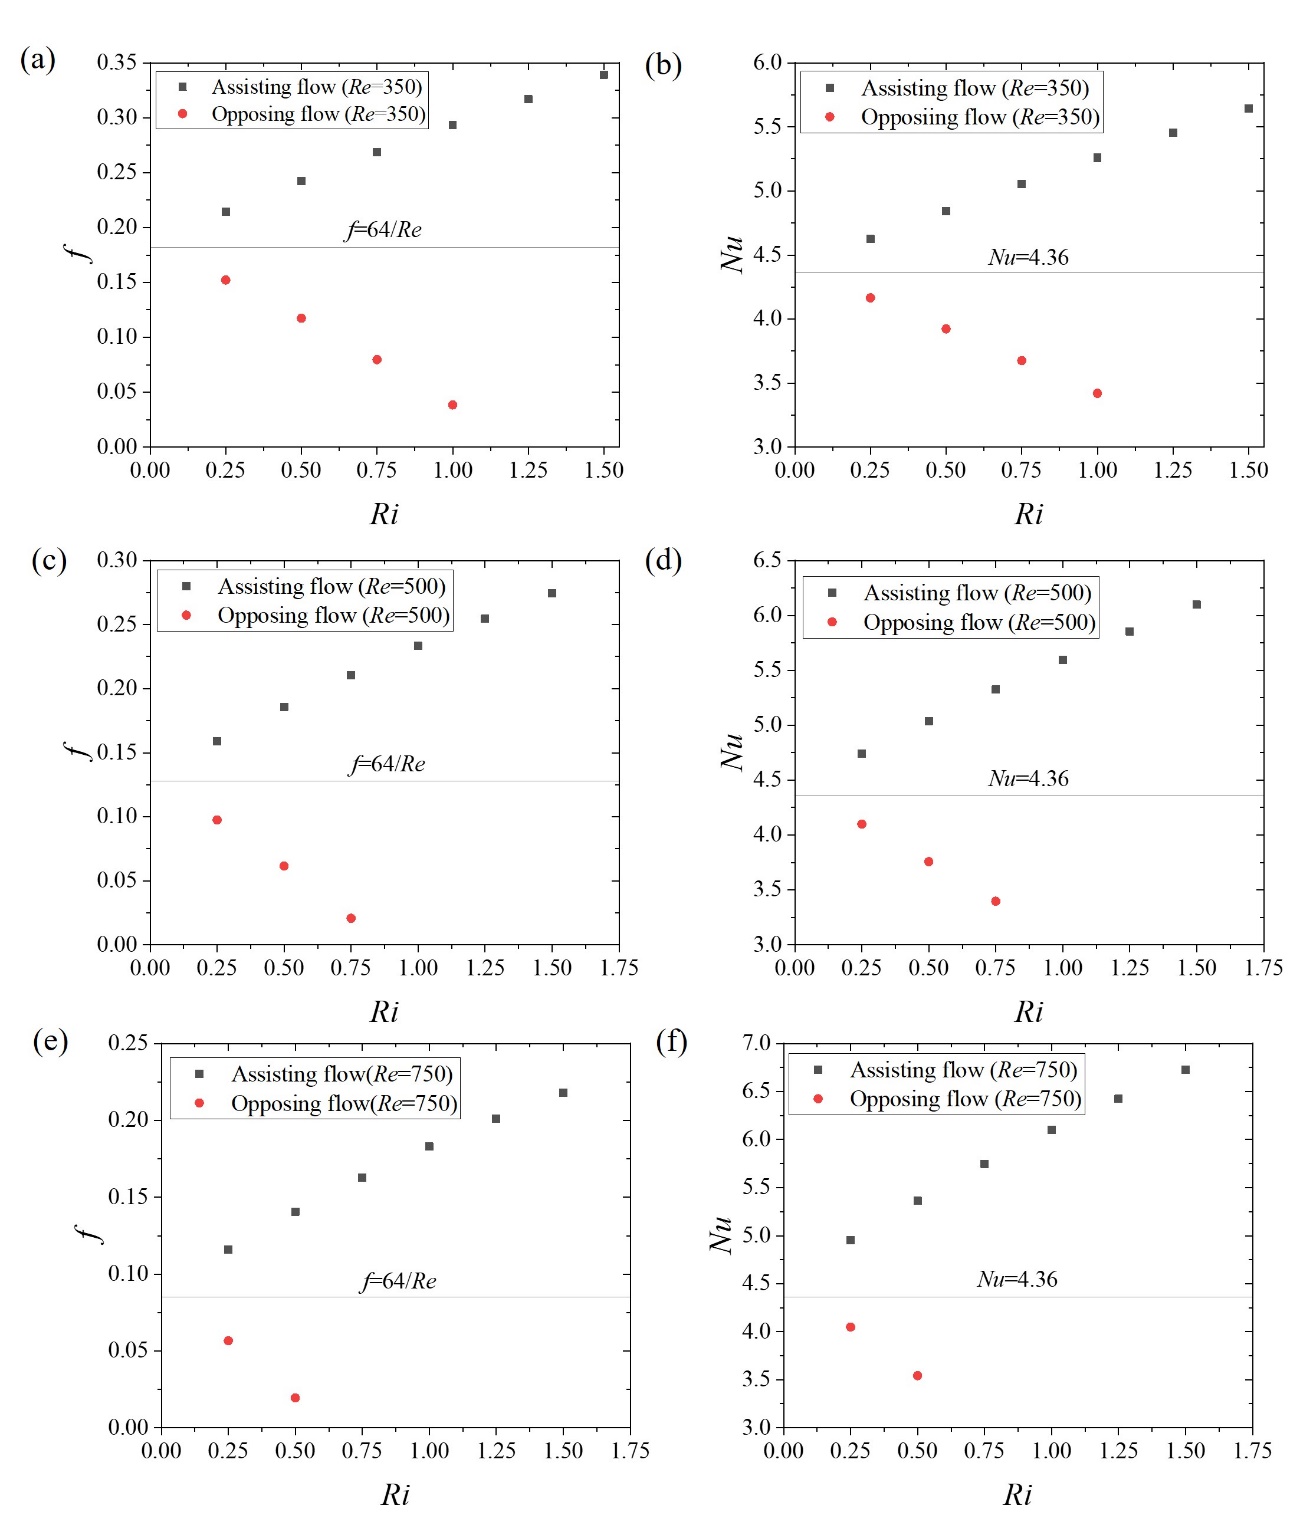


Fig. SI-13: Fully developed Vs and Vs plots corresponding to (a, b) (c, d) and (e, f) for assisting and opposing flow (numerical instability observed after for , after for and after for
